## **The principal mitochondrial $K^+$ uniport is associated with respiratory complex I**

Michael Zemel<sup>1</sup>, Alessia Angelin<sup>2</sup>, Prasanth Potluri<sup>2</sup>, Douglas C. Wallace<sup>2,3</sup>, Francesca Fieni<sup>1,4,\*</sup>

This manuscript has been withdrawn by the authors due to disagreement with UCSF over data rights.

This withdrawal decision is not related to the validity of the data presented in this study, and these authors understand that this work cannot be cited as reference for the project until the disagreement is resolved.
